# Supplementary material for: Computational study on the origin of the cancer immunotherapeutic potential of B and T cell epitope peptides
Source: Royal Society of Chemistry journal article supplement (doi:10.1039/c7mb00219j), 2017-09-07
Supplement: c7mb00219j2.xlsx [file c7mb00219j2.xlsx]

## Sheet: Sheet1
Confusion matrices of the classification instances, all entries are the average of 50 repeats
The numbers in the tables are averaged epitope numbers that were classified
Note that the epitope numbers changes according to sample balancing and tests/cross-validation set splitting
Oversampling approach
Instance 1				Instance 2				Instance 3				Instance 4				Instance 5				Instance 6				Instance 7				Instance 8							Instance 9						Instance 10
Dual_vs_Mono				Dual_vs_Tpos				Dual_vs_Bpos				Dual_vs_Control				Tpos_vs_Bpos				Tpos_vs_Control				Bpos_vs_Control				All_Classes							All_Epitopes_vs_Controls						All_Epitopes only
Cross-validation				Cross-validation				Cross-validation				Cross-validation				Cross-validation				Cross-validation				Cross-validation				Cross-validation							Cross-validation						Cross-validation
Mean	Dual	Mono		Mean	Dual	Tpos		Mean	Bpos	Dual		Mean	Control	Dual		Mean	Bpos	Tpos		Mean	Control	Tpos		Mean	Bpos	Control		Mean	Bneg	Bpos	Dual	Tneg	Tpos		Mean	Bpos	Control	Dual	Tpos		Mean	Bpos	Dual	Tpos
Dual	720	1.54		Dual	546	1.06		Bpos	168.7	0		Control	317.72	0		Bpos	669.98	64.48		Control	548.2	104.44		Bpos	302.74	57.68		Bneg	546	1.56	0	2.88	7.96		Bpos	523.6	30.54	0	46.32		Bpos	530.22	0	73.5
Mono	0	718.46		Tpos	0	544.94		Dual	5.3	174		Dual	5.28	323		Tpos	9.02	614.52		Tpos	66.8	510.56		Control	37.26	282.32		Bpos	0	525.86	0	17.06	55.38		Control	9.58	441.4	0	85.78		Dual	0	546	1.46
																												Dual	0	0	546	0	1		Dual	0	0.16	546	1.36		Tpos	15.78	0	471.04
Stdev	Dual	Mono		Stdev	Dual	Tpos		Stdev	Bpos	Dual		Stdev	Control	Dual		Stdev	Bpos	Tpos		Stdev	Control	Tpos		Stdev	Bpos	Control		Tneg	0	5.3	0	479.76	58.34		Tpos	12.82	73.9	0	412.54
Dual	0	0.787919		Dual	0	0.619743		Bpos	1.3132	0		Control	1.35586	0		Bpos	3.60549	5.3385		Control	6.91641	6.80684		Bpos	5.84776	4.69233		Tpos	0	13.28	0	46.3	423.32								Stdev	Bpos	Dual	Tpos
Mono	0	0.787919		Tpos	0	0.619743		Dual	1.3132	0		Dual	1.35586	0		Tpos	3.60549	5.3385		Tpos	6.91641	6.80684		Control	5.84776	4.69233									STDEV	Bpos	Control	Dual	Tpos		Bpos	4.37194	0	3.79177
																												STDEV	Bneg	Bpos	Dual	Tneg	Tpos		Bpos	5.04672	4.91233	0	4.64424		Dual	0	0	0.838122
Recall				Recall				Recall				Recall				Recall				Recall				Recall				Bneg	0	1.52744	0	1.79159	2.17556		Control	3.69274	9.87266	0	6.3705		Tpos	4.37194	0	3.92251
Mean	Bpos	Control		Mean	Bpos	Control		Mean	Bpos	Dual		Mean	Control	Dual		Mean	Bpos	Tpos		Mean	Control	Tpos		Mean	Bpos	Control		Bpos	0	4.75528	0	3.95077	3.2757		Dual	0	0.421852	0	0.631163
Bpos	720	0.8		Bpos	546	0.84		Bpos	174	0		Control	323	0		Bpos	678.44	12.54		Control	614.62	0.52		Bpos	339.72	0.48		Dual	0	0	0	0	0.571429		Tpos	3.76715	7.78342	0	6.25711		Recall
Control	0	719.2		Control	0	545.16		Dual	0	174		Dual	0	323		Tpos	0.56	666.46		Tpos	0.38	614.48		Control	0.28	339.52		Tneg	0	2.56547	0	6.41923	4.69307								Mean	Bpos	Dual	Tpos
																												Tpos	0	3.92293	0	6.14203	6.08256		Recall						Bpos	545.26	0	9.72
Stdev	Bpos	Control		Stdev	Bpos	Control		Stdev	Bpos	Dual		Stdev	Control	Dual		Stdev	Bpos	Tpos		Stdev	Control	Tpos		Stdev	Bpos	Control									Mean	Bpos	Control	Dual	Tpos		Dual	0	546	0.8
Bpos	0	0.404061		Bpos	0	0.370328		Bpos	0	0		Control	0	0		Bpos	0.972269	1.47372		Control	0.602376	0.579937		Bpos	0.496518	0.579937		Recall							Bpos	545.26	1.12	0	9.86		Tpos	0.74	0	535.48
Control	0	0.404061		Control	0	0.370328		Dual	0	0		Dual	0	0		Tpos	0.972269	1.47372		Tpos	0.602376	0.579937		Control	0.496518	0.579937		Mean	Bneg	Bpos	Dual	Tneg	Tpos		Control	0.14	544.64	0	0.62
																												Bneg	546	0	0	0	0.78		Dual	0	0	546	0.88		Stdev	Bpos	Dual	Tpos
Test				Test				Test				Test				Test				Test				Test				Bpos	0	544.92	0	1.14	9.66		Tpos	0.6	0.24	0	534.64		Bpos	0.852607	0	1.6418
Mean	Bpos	Control		Mean	Bpos	Control		Mean	Bpos	Dual		Mean	Control	Dual		Mean	Bpos	Tpos		Mean	Control	Tpos		Mean	Bpos	Control		Dual	0	0	546	0	0.84								Dual	0	0	0.404061
Bpos	179	0.32		Bpos	136	0.18		Bpos	41.74	0		Control	79.22	0		Bpos	167.4	15.5		Control	140.9	24.7		Bpos	77.16	13.24		Tneg	0	0.52	0	544.86	0		STDEV	Bpos	Control	Dual	Tpos		Tpos	0.852607	0	1.72898
Control	0	178.68		Control	0	135.82		Dual	1.26	43		Dual	0.78	80		Tpos	1.6	153.5		Tpos	12.1	128.3		Control	6.84	70.76		Tpos	0	0.56	0	0	534.72		Bpos	1.06541	0.659004	0	1.69043
																																			Control	0.452205	0.721676	0	0.490314		Test
Stdev	Bpos	Control		Stdev	Bpos	Control		Stdev	Bpos	Dual		Stdev	Control	Dual		Stdev	Bpos	Tpos		Stdev	Control	Tpos		Stdev	Bpos	Control		STDEV	Bneg	Bpos	Dual	Tneg	Tpos		Dual	0	0	0	0.328261		Mean	Bpos	Dual	Tpos
Bpos	0	0.512696		Bpos	0	0.388088		Bpos	1.27471	0		Control	0.974993	0		Bpos	2.12852	3.47146		Control	4.57254	4.21005		Bpos	3.29725	4.27885		Bneg	0	0	0	0	0.418452		Tpos	0.782461	0.431419	0	1.61321		Bpos	133.46	0	16.9
Control	0	0.512696		Control	0	0.388088		Dual	1.27471	0		Dual	0.974993	0		Tpos	2.12852	3.47146		Tpos	4.57254	4.21005		Control	3.29725	4.27885		Bpos	0	1.14	0	0.926041	1.42299								Dual	0	136	0.34
																												Dual	0	0	0	0	0.370328		Test						Tpos	2.54	0	118.76
																												Tneg	0	0.862838	0	0.926041	0		Mean	Bpos	Control	Dual	Tpos
																												Tpos	0	0.786623	0	0	1.40029		Bpos	133.26	6.04	0	11.02		Stdev	Bpos	Dual	Tpos
																																			Control	1.08	114.7	0	20.66		Bpos	2.42613	0	3.82926
																												Test							Dual	0	0	136	0.16		Dual	0	0	0.478518
																												Mean	Bneg	Bpos	Dual	Tneg	Tpos		Tpos	1.66	15.26	0	104.16		Tpos	2.42613	0	3.77727
																												Bneg	136	0.18	0	0.5	1.84
																												Bpos	0	132.42	0	2.72	12.96		STDEV	Bpos	Control	Dual	Tpos
																												Dual	0	0	136	0	0.26		Bpos	2.30182	3.16847	0	3.14604
																												Tneg	0	1.04	0	125.48	13.7		Control	1.5097	5.25376	0	4.95947
																												Tpos	0	2.36	0	7.3	107.24		Dual	0	0	0	0.370328
																																			Tpos	1.9651	4.4346	0	5.45243
																												STDEV	Bneg	Bpos	Dual	Tneg	Tpos
																												Bneg	0	0.719694	0	1.0351	1.18425
																												Bpos	0	2.85064	0	2.2135	3.46975
																												Dual	0	0	0	0	0.527218
																												Tneg	0	1.7608	0	4.70015	3.3335
																												Tpos	0	2.31023	0	3.83991	4.73183
Undersampling approach
Instance 1				Instance 2				Instance 3				Instance 4				Instance 5				Instance 6				Instance 7				Instance 8							Instance 9						Instance 10
Dual_vs_Mono				Dual_vs_Tpos				Dual_vs_Bpos				Dual_vs_Control				Tpos_vs_Bpos				Tpos_vs_Control				Bpos_vs_Control				All_Classes							All_Epitopes_vs_Controls						All_Epitopes only
Cross-validation				Cross-validation				Cross-validation				Cross-validation				Cross-validation				Cross-validation				Cross-validation				Cross-validation							Cross-validation						Cross-validation
Mean	Dual	Mono		Mean	Dual	Tpos		Mean	Bpos	Dual		Mean	Control	Dual		Mean	Bpos	Tpos		Mean	Control	Tpos		Mean	Bpos	Control		Mean	Bneg	Bpos	Dual	Tneg	Tpos		Mean	Bpos	Control	Dual	Tpos		Mean	Bpos	Dual	Tpos
Dual	31	0.82		Dual	31	0.2		Bpos	27.46	0.94		Control	29.56	0.04		Bpos	183.3	38.84		Control	263.9	107.28		Bpos	145.56	58.3		Bneg	18.18	4.94	0.08	2.26	0.32		Bpos	18.68	8.48	0.06	4.56		Bpos	22.8	0.24	6.52
Mono	0	30.18		Tpos	0	30.8		Dual	3.54	30.06		Dual	1.44	30.96		Tpos	28.7	173.16		Tpos	120.1	276.72		Control	66.44	153.7		Bpos	5.9	17.3	0.1	6.56	4.74		Control	7.86	7.2	0	6.9		Dual	1.08	30.76	0.1
																												Dual	2.94	0.62	30.82	0.88	0.16		Dual	1.34	0.48	30.94	0.2		Tpos	7.12	0	24.38
Stdev	Dual	Mono		Stdev	Dual	Tpos		Stdev	Bpos	Dual		Stdev	Control	Dual		Stdev	Bpos	Tpos		Stdev	Control	Tpos		Stdev	Bpos	Control		Tneg	2.78	4.32	0	7.82	4.92		Tpos	3.12	14.84	0	19.34
Dual	0	0.522553		Dual	0	0.451754		Bpos	0.838122	0.682433		Control	0.860944	0.197949		Bpos	3.54706	3.43666		Control	4.62138	4.76826		Bpos	5.69697	4.35304		Tpos	1.2	3.82	0	13.48	20.86								Stdev	Bpos	Dual	Tpos
Mono	0	0.522553		Tpos	0	0.451754		Dual	0.838122	0.682433		Dual	0.860944	0.197949		Tpos	3.54706	3.43666		Tpos	4.62138	4.76826		Control	5.69697	4.35304									STDEV	Bpos	Control	Dual	Tpos		Bpos	1.59079	0.431419	1.23288
																												STDEV	Bneg	Bpos	Dual	Tneg	Tpos		Bpos	1.3468	1.6932	0.239898	1.01338		Dual	0.751597	0.431419	0.364216
Recall				Recall				Recall				Recall				Recall				Recall				Recall				Bneg	1.88105	1.26829	0.274048	1.10306	0.512696		Control	1.52543	2.63416	0	1.60675		Tpos	1.42342	0	1.3981
Mean	Dual	Mono		Mean	Dual	Tpos		Mean	Bpos	Dual		Mean	Control	Dual		Mean	Bpos	Tpos		Mean	Control	Tpos		Mean	Bpos	Control		Bpos	1.6194	1.87628	0.303046	1.35767	1.27471		Dual	0.717422	0.646498	0.239898	0.404061
Dual	31	0		Dual	31	0		Bpos	31	0		Control	31	0		Bpos	211.96	0.52		Control	383.82	0.1		Bpos	211.98	0.08		Dual	1.21907	0.830294	0.437526	0.91785	0.421852		Tpos	1.00285	2.39353	0	1.80261		Recall
Mono	0	31		Tpos	0	31		Dual	0	31		Dual	0	31		Tpos	0.04	211.48		Tpos	0.18	383.9		Control	0.02	211.92		Tneg	1.29819	1.5576	0	2.87629	1.39737								Mean	Bpos	Dual	Tpos
																												Tpos	0.857143	1.17265	0	2.4598	1.89532		Recall						Bpos	31	0	0
Stdev	Dual	Mono		Stdev	Dual	Tpos		Stdev	Bpos	Dual		Stdev	Control	Dual		Stdev	Bpos	Tpos		Stdev	Control	Tpos		Stdev	Bpos	Control									Mean	Bpos	Control	Dual	Tpos		Dual	0	31	0
Dual	0	0		Dual	0	0		Bpos	0	0		Control	0	0		Bpos	0.197949	0.504672		Control	0.388088	0.303046		Bpos	0.141421	0.274048		Recall							Bpos	31	0	0	0		Tpos	0	0	31
Mono	0	0		Tpos	0	0		Dual	0	0		Dual	0	0		Tpos	0.197949	0.504672		Tpos	0.388088	0.303046		Control	0.141421	0.274048		Mean	Bneg	Bpos	Dual	Tneg	Tpos		Control	0	31	0	0
																												Bneg	31	0	0	0	0		Dual	0	0	31	0		Stdev	Bpos	Dual	Tpos
																												Bpos	0	31	0	0	0		Tpos	0	0	0	31		Bpos	0	0	0
																												Dual	0	0	31	0	0								Dual	0	0	0
																												Tneg	0	0	0	31	0		STDEV	Bpos	Control	Dual	Tpos		Tpos	0	0	0
																												Tpos	0	0	0	0	31		Bpos	0	0	0	0
																																			Control	0	0	0	0
																												STDEV	Bneg	Bpos	Dual	Tneg	Tpos		Dual	0	0	0	0
																												Bneg	0	0	0	0	0		Tpos	0	0	0	0
																												Bpos	0	0	0	0	0
																												Dual	0	0	0	0	0
																												Tneg	0	0	0	0	0
																												Tpos	0	0	0	0	0
