# Supplementary material for: Computational study on the origin of the cancer immunotherapeutic potential of B and T cell epitope peptides
Source: Royal Society of Chemistry journal article supplement (doi:10.1039/c7mb00219j), 2017-09-07
Supplement: c7mb00219j3.xlsx [file c7mb00219j3.xlsx]

## Sheet: Sheet1
A listing of molecular descriptors with top 20 gini-indexes in different classification settings
All lists are the average of 50 repeat runs
See Supplementary Table 1 Descriptor Legends for a fill listing of descriptor names
Oversampling approach
Instance 1				Instance 2				Instance 3				Instance 4				Instance 5				Instance 6				Instance 7				Instance 8				Instance 9				Instance 10
Dual_vs_Mono				Dual_vs_Tpos				Dual_vs_Bpos				Dual_vs_Control				Tpos_vs_Bpos				Tpos_vs_Control				Bpos_vs_Control				All_Classes				All_Epitopes_vs_Controls				All_Epitopes only
Descriptor Name	GINI-index	StDev of GINI-index		Descriptor Name	GINI-index	StDev of GINI-index		Descriptor Name	GINI-index	StDev of GINI-index		Descriptor Name	GINI-index	StDev of GINI-index		Descriptor Name	GINI-index	StDev of GINI-index		Descriptor Name	GINI-index	StDev of GINI-index		Descriptor Name	GINI-index	StDev of GINI-index		Descriptor Name	GINI-index	StDev of GINI-index		Descriptor Name	GINI-index	StDev of GINI-index		Descriptor Name	GINI-index	StDev of GINI-index
MW	13.574	2.271		MW	7.335	1.185		MW	7.477	1.141		MW	10.781	1.354		MW	16.53	2.234		MW	6.517	0.978		MW	2.397	0.466		MW	24.563	2.112		MW	22.644	2.269		MW	22.689	3.206
G5.1.1.7.	10.858	1.861		lag3	7.235	1.341		G4.3.5.2.	5.719	1.005		G5.2.1.7.	8.802	1.371		G5.1.1.7.	10.437	1.64		G5.1.1.4.	5.474	0.988		Normalized.relative.frequency.of.bend.R..Isogai.et.al...1980.	1.533	0.323		G5.1.1.4.	16.022	2.075		G5.1.1.7.	15.067	2.003		G4.3.5.2.	15.669	2.716
G5.1.1.1.	10.592	1.417		G5.1.1.1.	6.711	0.929		G5.2.1.7.	5.446	0.985		G5.1.1.7.	8.426	1.398		G4.3.5.2.	10.325	1.536		G5.2.1.6.	5.406	0.957		Free.energy.in.beta.strand.region..Munoz.Serrano..1994.	1.478	0.413		G5.1.1.7.	15.669	1.571		G5.2.1.7.	14.381	2.044		G5.1.1.7.	15.412	2.25
G5.2.1.7.	10.58	1.798		G5.1.2.21.	6.467	0.81		G5.1.1.7.	5.347	0.948		G5.2.1.6.	7.117	1.335		G5.2.1.6.	9.852	1.66		G5.1.1.7.	5.179	0.911		p.Values.of.mesophilic.proteins.based.on.the.distributions.of.B.values..Parthasarathy.Murthy..2000.	1.255	0.457		G5.2.1.7.	15.437	1.886		G4.3.5.2.	13.452	1.867		G5.2.1.7.	14.596	1.862
G4.3.5.2.	10.32	1.96		G5.2.1.7.	6.432	1.12		G5.2.1.6.	4.621	0.887		G5.1.1.4.	7.094	1.25		G5.2.2.26.	9.555	1.655		G5.1.1.6.	4.934	0.904		Free.energy.in.beta.strand.region..Munoz.Serrano..1994..1	1.236	0.353		G4.3.5.2.	13.195	1.766		G5.2.1.6.	13.244	1.611		G5.2.1.6.	12.771	1.911
lag3	8.782	1.697		G5.1.1.7.	6.104	1.198		G5.1.2.27.	4.203	0.85		G4.3.5.2.	6.742	1.14		G5.1.2.27.	9.083	1.401		G5.2.1.7.	4.472	0.75		Weights.for.coil.at.the.window.position.of.1..Qian.Sejnowski..1988.	1.101	0.308		G5.2.1.6.	12.647	1.747		G5.1.1.4.	11.697	1.878		G5.1.1.4.	12.239	1.94
G5.2.2.27.	8.269	1.717		Optimized.beta.structure.coil.equilibrium.constant..Oobatake.et.al...1985.	5.754	1.048		G5.2.2.27.	4.068	0.747		G5.2.2.27.	6.414	1.348		G5.2.1.7.	8.693	1.404		G5.2.2.27.	4.138	0.587		Weights.for.beta.sheet.at.the.window.position.of.1..Qian.Sejnowski..1988.	1.087	0.385		G5.1.1.6.	11.832	1.227		G5.2.2.27.	11.62	1.821		G5.1.2.27.	12.225	1.375
Weights.for.alpha.heliat.the.window.position.of.5..Qian.Sejnowski..1988.	8.232	1.687		G4.3.5.2.	5.627	0.945		G5.1.1.4.	3.821	0.738		G5.2.1.4.	6.248	1.236		G5.1.1.6.	8.527	1.436		G5.2.2.26.	3.866	0.65		Weights.for.coil.at.the.window.position.of.2..Qian.Sejnowski..1988.	1.048	0.303		G5.2.2.27.	11.704	1.402		G5.2.2.26.	10.88	1.757		G5.2.2.27.	11.26	1.677
G5.1.2.21.	8.009	1.409		Beta.sheet.propensity.derived.from.designed.sequences..Koehl.Levitt..1999.	5.358	1.104		G5.2.1.4.	3.731	0.785		G5.1.2.27.	5.389	1.057		G5.2.2.27.	6.955	1.457		G5.1.2.27.	3.723	0.652		G4.3.5.2.	1.029	0.351		G5.1.1.1.	11.144	1.277		G5.1.2.27.	10.637	1.6		G5.1.1.1.	11.034	1.623
G5.2.1.6.	7.937	1.674		Weights.for.alpha.heliat.the.window.position.of.5..Qian.Sejnowski..1988.	5.16	1.16		G5.2.2.26.	3.608	0.91		G5.1.1.6.	5.341	1.042		G5.1.1.5.	6.848	1.677		G5.1.1.1.	3.702	0.56		Normalized.frequency.of.chain.reversal.R..Tanaka.Scheraga..1977.	1.018	0.305		G5.1.2.27.	10.719	1.81		G5.1.1.1.	10.39	1.229		G5.2.2.26.	10.76	1.597
G5.2.1.3.	7.855	1.408		Weights.for.alpha.heliat.the.window.position.of.6..Qian.Sejnowski..1988.	5.02	0.792		G5.2.1.3.	3.16	0.728		G5.1.1.1.	5.316	1.044		G5.1.1.4.	6.67	1.321		G4.3.5.2.	3.581	0.815		G5.2.1.3.	1.009	0.258		G5.2.1.4.	10.578	1.512		G5.1.1.6.	9.457	1.612		G5.1.1.6.	9.986	2.016
Weights.for.alpha.heliat.the.window.position.of.6..Qian.Sejnowski..1988.	7.813	1.379		lag1.26	4.999	0.808		G5.1.1.6.	2.861	0.592		G5.2.2.26.	4.954	0.941		G5.2.1.3.	5.654	1.084		G5.2.1.4.	3.448	0.654		Propensity.of.amino.acids.within.pi.helices..Fodje.Al.Karadaghi..2002.	0.998	0.345		G5.2.2.26.	9.585	1.428		G5.2.1.4.	9.42	1.468		G5.2.1.3.	9.697	1.42
G5.1.1.4.	7.378	1.46		lag2.2	4.676	0.917		G5.1.1.3.	2.711	0.596		G5.2.1.5.	4.731	0.856		G5.2.1.5.	5.25	1.036		G5.2.1.5.	3.42	0.529		G5.1.2.3.	0.952	0.169		G5.2.1.3.	9.499	1.293		G5.2.1.3.	9.207	1.346		G5.2.1.4.	8.927	1.409
G5.2.1.4.	7.25	1.358		G5.2.1.3.	4.649	1.001		G5.1.1.5.	2.567	0.51		G5.2.1.3.	4.369	0.76		G5.1.1.3.	5.167	1.168		G5.1.1.5.	3.415	0.527		lag2.6	0.944	0.238		G5.2.1.5.	9.086	1.146		lag3	9.2	1.318		G5.1.1.5.	8.429	1.665
G5.1.2.27.	6.691	1.373		G5.2.1.6.	4.173	0.968		G5.2.1.5.	2.564	0.652		G5.1.1.3.	3.912	0.862		G5.2.1.4.	5.103	1.17		G5.1.1.2.	3.216	0.636		lag6.10	0.934	0.274		lag3	8.787	1.323		G5.2.1.5.	8.341	1.25		G5.1.1.3.	8.183	1.534
Optimized.beta.structure.coil.equilibrium.constant..Oobatake.et.al...1985.	6.58	1.244		lag2.14	4.026	0.729		Propensity.of.amino.acids.within.pi.helices..Fodje.Al.Karadaghi..2002.	2.293	0.652		Weights.for.alpha.heliat.the.window.position.of.6..Qian.Sejnowski..1988.	3.643	0.656		G5.1.2.26.	4.97	0.939		G5.2.1.2.	2.806	0.492		G5.2.2.23.	0.93	0.272		G5.1.1.5.	8.554	1.129		G5.1.1.5.	7.986	1.256		lag3	8.127	1.433
Propensity.of.amino.acids.within.pi.helices..Fodje.Al.Karadaghi..2002.	6.538	1.105		G5.2.2.27.	4.024	1.103		G5.1.1.1.	2.216	0.556		G5.1.1.5.	3.541	0.894		G5.1.1.1.	4.207	0.828		G5.1.1.3.	2.737	0.54		lag2.17	0.894	0.206		Propensity.of.amino.acids.within.pi.helices..Fodje.Al.Karadaghi..2002.	8.526	1.339		G5.1.1.3.	7.823	1.368		G5.2.1.5.	7.885	1.243
Beta.sheet.propensity.derived.from.designed.sequences..Koehl.Levitt..1999.	6.217	0.887		lag5.2	4.005	1.098		Weights.for.alpha.heliat.the.window.position.of.5..Qian.Sejnowski..1988.	2.141	0.612		lag3	2.615	0.718		p.Values.of.mesophilic.proteins.based.on.the.distributions.of.B.values..Parthasarathy.Murthy..2000.	4.125	1.152		G5.2.1.1.	2.444	0.428		lag4.14	0.891	0.238		G5.1.1.3.	8.276	1.105		Weights.for.alpha.heliat.the.window.position.of.5..Qian.Sejnowski..1988.	6.24	1.061		Propensity.of.amino.acids.within.pi.helices..Fodje.Al.Karadaghi..2002.	7.262	1.313
lag2.14	5.668	0.853		G5.2.1.4.	3.926	0.866		G4.3.1.2.	1.589	0.492		Weights.for.alpha.heliat.the.window.position.of.5..Qian.Sejnowski..1988.	2.597	0.674		G5.1.1.2.	3.724	1.118		G5.1.2.26.	2.263	0.466		G5.2.2.4.	0.853	0.208		G5.1.2.26.	6.854	0.853		Propensity.of.amino.acids.within.pi.helices..Fodje.Al.Karadaghi..2002.	6.096	1.005		Weights.for.alpha.heliat.the.window.position.of.5..Qian.Sejnowski..1988.	7.098	1.434
lag1.26	5.653	0.816		Propensity.of.amino.acids.within.pi.helices..Fodje.Al.Karadaghi..2002.	3.545	0.829		G4.3.6.15.	1.389	0.378		G5.2.1.1.	2.449	0.61		ALTFT.inde.Cornette.et.al...1987.	2.402	0.845		G5.1.2.24.	2.195	0.467		Normalized.frequency.of.beta.sheet..Chou.Fasman..1978b.	0.839	0.283		G5.2.1.1.	6.718	0.811		Optimized.beta.structure.coil.equilibrium.constant..Oobatake.et.al...1985.	5.248	0.731		Optimized.beta.structure.coil.equilibrium.constant..Oobatake.et.al...1985.	6.279	0.808
Undersampling approach
Instance 1				Instance 2				Instance 3				Instance 4				Instance 5				Instance 6				Instance 7				Instance 8				Instance 9				Instance 10
Dual_vs_Mono				Dual_vs_Tpos				Dual_vs_Bpos				Dual_vs_Control				Tpos_vs_Bpos				Tpos_vs_Control				Bpos_vs_Control				All_Classes				All_Epitopes_vs_Controls				All_Epitopes only
Descriptor Name	GINI-index	StDev of GINI-index		Descriptor Name	GINI-index	StDev of GINI-index		Descriptor Name	GINI-index	StDev of GINI-index		Descriptor Name	GINI-index	StDev of GINI-index		Descriptor Name	GINI-index	StDev of GINI-index		Descriptor Name	GINI-index	StDev of GINI-index		Descriptor Name	GINI-index	StDev of GINI-index		Descriptor Name	GINI-index	StDev of GINI-index		Descriptor Name	GINI-index	StDev of GINI-index		Descriptor Name	GINI-index	StDev of GINI-index
G5.2.2.13.	1.009	0.297		G5.1.2.11.	0.947	0.247		MW	0.909	0.25		G5.2.2.17.	0.707	0.178		MW	4.121	0.601		MW	3.769	0.603		MW	1.273	0.326		T	0.836	0.175		T	0.989	0.221		G5.1.2.11.	0.886	0.218
M	0.97	0.234		M	0.922	0.256		G5.1.1.7.	0.69	0.179		G5.1.2.17.	0.702	0.185		G4.3.5.2.	3.837	0.657		G5.1.1.4.	3.314	0.602		Free.energy.in.beta.strand.region..Munoz.Serrano..1994..1	1.022	0.24		LL	0.822	0.209		G5.2.2.17.	0.928	0.175		G5.2.2.17.	0.881	0.198
G5.1.2.11.	0.908	0.208		G5.2.2.13.	0.917	0.239		G5.1.2.27.	0.631	0.197		T	0.663	0.156		G5.1.1.7.	2.935	0.477		G5.1.1.7.	3.139	0.502		Free.energy.in.beta.strand.region..Munoz.Serrano..1994.	0.986	0.177		G5.2.2.17.	0.76	0.152		G5.1.2.17.	0.898	0.163		T	0.867	0.181
T	0.672	0.198		G5.1.2.17.	0.794	0.192		G5.2.1.7.	0.627	0.196		G5.1.2.11.	0.654	0.216		G5.2.2.26.	2.864	0.551		G4.3.5.2.	3.114	0.479		alpha.NH.chemical.shifts..Bundi.Wuthrich..1979.	0.927	0.244		G5.1.2.17.	0.747	0.204		G5.1.2.11.	0.825	0.214		G5.2.2.13.	0.858	0.218
G5.2.2.17.	0.666	0.175		T	0.768	0.159		G4.3.5.2.	0.569	0.167		G5.2.2.13.	0.641	0.259		G5.1.2.27.	2.608	0.459		G5.2.1.6.	2.901	0.437		G4.3.6.5.	0.838	0.218		MW	0.738	0.154		G5.2.2.13.	0.817	0.203		G5.1.2.17.	0.839	0.247
G5.1.2.17.	0.664	0.181		G5.2.2.17.	0.753	0.189		G5.2.2.27.	0.565	0.172		G5.1.2.2.	0.582	0.209		G5.2.1.6.	2.564	0.477		G5.1.1.6.	2.871	0.453		G4.3.5.2.	0.833	0.31		G4.3.1.15.	0.709	0.172		G4.3.1.15.	0.72	0.216		M	0.739	0.231
C	0.655	0.2		C	0.727	0.227		G5.2.1.6.	0.453	0.159		M	0.575	0.203		G5.2.1.7.	2.552	0.513		G5.2.1.7.	2.668	0.37		G4.3.3.14.	0.819	0.247		G5.2.2.13.	0.643	0.192		G4.3.3.13.	0.642	0.176		MW	0.651	0.212
G5.1.2.2.	0.647	0.175		G5.1.2.2.	0.665	0.228		G4.3.7.13.	0.434	0.163		G5.2.2.5.	0.567	0.189		G5.2.2.27.	2.548	0.553		G5.2.2.26.	2.511	0.467		Normalized.relative.frequency.of.bend.R..Isogai.et.al...1980.	0.813	0.227		G4.3.3.13.	0.613	0.17		M	0.635	0.178		G4.3.1.15.	0.603	0.194
G5.2.2.5.	0.646	0.192		G5.2.2.5.	0.66	0.196		G5.1.1.4.	0.415	0.164		C	0.561	0.197		G5.1.1.6.	2.367	0.518		G5.2.2.27.	2.384	0.31		G4.3.4.2.	0.802	0.21		G5.1.2.11.	0.588	0.203		MW	0.539	0.171		G4.3.3.13.	0.602	0.195
LL	0.559	0.194		LL	0.559	0.229		T	0.41	0.174		G4.3.3.13.	0.471	0.189		G4.3.4.2.	2.147	0.371		G5.1.1.1.	2.29	0.462		G5.2.2.23.	0.743	0.17		G5.1.1.7.	0.572	0.163		G5.2.2.5.	0.519	0.167		G5.2.2.5.	0.582	0.199
G4.3.1.15.	0.517	0.156		G4.3.1.15.	0.448	0.178		G5.1.2.17.	0.389	0.169		G4.3.1.15.	0.453	0.143		G4.3.6.15.	2.016	0.411		G5.1.2.27.	2.255	0.408		G5.2.1.3.	0.735	0.184		G5.2.1.7.	0.569	0.152		G5.1.2.2.	0.516	0.164		G4.3.7.13.	0.578	0.208
G4.3.3.13.	0.507	0.158		G4.3.7.13.	0.387	0.165		G4.3.3.13.	0.375	0.141		Aggregation	0.417	0.2		G5.1.1.5.	1.985	0.34		G5.2.1.5.	2.196	0.307		Average.relative.fractional.occurrence.in.EL.i.1...Rackovsky.Scheraga..1982.	0.663	0.206		G5.1.1.4.	0.528	0.162		G4.3.7.13.	0.505	0.153		G5.1.2.2.	0.572	0.185
G4.3.7.13.	0.5	0.175		Aggregation	0.35	0.175		G5.1.1.6.	0.364	0.187		MW	0.388	0.178		G5.2.1.3.	1.932	0.377		G5.1.1.5.	2.19	0.471		p.Values.of.mesophilic.proteins.based.on.the.distributions.of.B.values..Parthasarathy.Murthy..2000.	0.625	0.187		G5.1.2.2.	0.512	0.165		G4.3.2.14.	0.498	0.13		C	0.512	0.157
Aggregation	0.36	0.134		G4.3.3.13.	0.338	0.108		Propensity.of.amino.acids.within.pi.helices..Fodje.Al.Karadaghi..2002.	0.363	0.139		G5.1.1.7.	0.379	0.221		G5.1.1.4.	1.877	0.43		G5.1.1.2.	1.997	0.307		Heliinitiation.parameter.at.posision.i.i.1.i.2..Finkelstein.et.al...1991.	0.591	0.161		G5.2.2.27.	0.509	0.146		C	0.457	0.144		G5.1.1.7.	0.487	0.153
lag5.2	0.268	0.088		G4.3.2.14.	0.315	0.132		G5.2.2.17.	0.358	0.155		G5.2.1.7.	0.379	0.179		G5.1.1.3.	1.693	0.321		G5.2.1.2.	1.876	0.397		lag2.6	0.591	0.14		M	0.506	0.137		G4.3.4.14.	0.444	0.142		G4.3.5.2.	0.461	0.181
lag2.2	0.257	0.116		alpha.NH.chemical.shifts..Bundi.Wuthrich..1979.	0.299	0.123		G4.3.1.15.	0.344	0.131		G5.2.2.27.	0.315	0.137		G4.3.1.2.	1.65	0.395		G5.1.1.3.	1.853	0.364		Normalized.frequency.of.chain.reversal.R..Tanaka.Scheraga..1977.	0.583	0.163		G4.3.7.13.	0.506	0.203		lag5.29	0.424	0.122		G5.1.2.27.	0.454	0.132
lag3.25	0.245	0.101		G4.3.4.14.	0.281	0.105		Weights.for.alpha.heliat.the.window.position.of.5..Qian.Sejnowski..1988.	0.336	0.146		G4.3.7.13.	0.31	0.131		G5.1.2.26.	1.526	0.349		G5.2.1.4.	1.846	0.263		Weights.for.coil.at.the.window.position.of.1..Qian.Sejnowski..1988.	0.574	0.195		G5.2.2.5.	0.492	0.134		G5.1.1.7.	0.416	0.161		G5.2.1.7.	0.391	0.176
lag5.29	0.24	0.085		lag2.2	0.264	0.094		G5.2.2.26.	0.322	0.119		G5.2.2.15.	0.308	0.145		G5.1.1.2.	1.415	0.321		G5.2.2.25.	1.61	0.314		P	0.559	0.183		G4.3.5.2.	0.468	0.137		lag5.36	0.385	0.105		G5.2.2.27.	0.382	0.151
G4.3.2.14.	0.231	0.11		G5.2.2.8.	0.253	0.1		G5.2.1.3.	0.312	0.12		G5.1.2.13.	0.302	0.161		G5.2.1.4.	1.395	0.348		G4.3.4.2.	1.512	0.324		G4.3.2.2.	0.558	0.152		G5.1.2.27.	0.468	0.124		G4.3.5.2.	0.371	0.122		G5.1.1.4.	0.337	0.142
alpha.NH.chemical.shifts..Bundi.Wuthrich..1979.	0.215	0.108		G4.3.6.13.	0.243	0.107		G5.2.1.4.	0.31	0.122		G4.3.2.14.	0.3	0.105		G5.1.1.1.	1.374	0.408		G5.2.1.3.	1.474	0.324		G5.1.1.7.	0.531	0.142		lag3	0.466	0.146		G5.1.2.27.	0.37	0.136		G5.2.1.6.	0.336	0.165
Unique descriptor occurrence count (In how many classification instances did it ranked top 20)
in 10 undersampling instances
Descriptor Index	Descriptor Name	Occurrence Count
1	MW	8
2	X.G5.1.1.7.	8
3	T	7
4	X.G4.3.1.15.	7
5	X.G4.3.3.13.	7
6	X.G4.3.5.2.	7
7	X.G4.3.7.13.	7
8	X.G5.1.2.17.	7
9	X.G5.2.2.17.	7
10	M	6
11	X.G5.1.2.11.	6
12	X.G5.1.2.2.	6
13	X.G5.1.2.27.	6
14	X.G5.2.1.7.	6
15	X.G5.2.2.13.	6
16	X.G5.2.2.27.	6
17	X.G5.2.2.5.	6
18	C	5
19	X.G5.1.1.4.	5
20	X.G4.3.2.14.	4
21	X.G5.2.1.3.	4
22	X.G5.2.1.6.	4
23	Aggregation	3
24	alpha.NH.chemical.shifts..Bundi.Wuthrich..1979.	3
25	LL	3
26	X.G4.3.4.2.	3
27	X.G5.1.1.6.	3
28	X.G5.2.1.4.	3
29	X.G5.2.2.26.	3
30	lag2.2	2
31	lag5.29	2
32	X.G4.3.4.14.	2
33	X.G5.1.1.1.	2
34	X.G5.1.1.2.	2
35	X.G5.1.1.3.	2
36	X.G5.1.1.5.	2
37	Average.relative.fractional.occurrence.in.EL.i.1...Rackovsky.Scheraga..1982.	1
38	Free.energy.in.beta.strand.region..Munoz.Serrano..1994.	1
39	Free.energy.in.beta.strand.region..Munoz.Serrano..1994..1	1
40	Helix.initiation.parameter.at.posision.i.i.1.i.2..Finkelstein.et.al...1991.	1
41	lag2.6	1
42	lag3	1
43	lag3.25	1
44	lag5.2	1
45	lag5.36	1
46	Normalized.frequency.of.chain.reversal.R..Tanaka.Scheraga..1977.	1
47	Normalized.relative.frequency.of.bend.R..Isogai.et.al...1980.	1
48	P	1
49	p.Values.of.mesophilic.proteins.based.on.the.distributions.of.B.values..Parthasarathy.Murthy..2000.	1
50	Propensity.of.amino.acids.within.pi.helices..Fodje.Al.Karadaghi..2002.	1
51	Weights.for.alpha.helix.at.the.window.position.of.5..Qian.Sejnowski..1988.	1
52	Weights.for.coil.at.the.window.position.of.1..Qian.Sejnowski..1988.	1
53	X.G4.3.1.2.	1
54	X.G4.3.2.2.	1
55	X.G4.3.3.14.	1
56	X.G4.3.6.13.	1
57	X.G4.3.6.15.	1
58	X.G4.3.6.5.	1
59	X.G5.1.2.13.	1
60	X.G5.1.2.26.	1
61	X.G5.2.1.2.	1
62	X.G5.2.1.5.	1
63	X.G5.2.2.15.	1
64	X.G5.2.2.23.	1
65	X.G5.2.2.25.	1
66	X.G5.2.2.8.	1
